# Supplementary material
Source: PubMed Central journal article supplement (PMC6735278)
Supplement: jnm224055SupplementalData.pdf [file jnm224055SupplementalData.pdf]

**Supplemental Table 1.** The liver SUV<sub>mean</sub>, standard deviation (SD) and SUV<sub>thr\_st</sub> obtained by both observers in all patients

| Observer 1          |     |                       |                     |     |                       | Observer 2          |     |                       |
|---------------------|-----|-----------------------|---------------------|-----|-----------------------|---------------------|-----|-----------------------|
| Read 1              |     |                       | Read 2              |     |                       |                     |     |                       |
| SUV <sub>mean</sub> | SD  | SUV <sub>thr_st</sub> | SUV <sub>mean</sub> | SD  | SUV <sub>thr_st</sub> | SUV <sub>mean</sub> | SD  | SUV <sub>thr_st</sub> |
| 2.9                 | 0.6 | 5.2                   | 3.1                 | 0.6 | 5.1                   | 3.0                 | 0.7 | 5.3                   |
| 5.7                 | 0.8 | 4.9                   | 5.5                 | 0.7 | 4.8                   | 5.5                 | 0.7 | 4.8                   |
| 2.7                 | 0.5 | 5.1                   | 2.6                 | 0.4 | 5.0                   | 2.6                 | 0.4 | 5.0                   |
| 8.2                 | 1.4 | 5.0                   | 8.2                 | 1.4 | 5.0                   | 8.1                 | 1.3 | 5.0                   |
| 4.6                 | 0.8 | 5.0                   | 4.6                 | 0.8 | 5.0                   | 4.6                 | 0.8 | 5.0                   |
| 3.9                 | 1.2 | 5.6                   | 4.0                 | 1.2 | 5.6                   | 4.0                 | 1.0 | 5.4                   |
| 3.6                 | 0.6 | 5.0                   | 3.6                 | 0.6 | 5.0                   | 3.6                 | 0.6 | 5.0                   |
| 4.3                 | 0.5 | 4.8                   | 4.3                 | 0.5 | 4.8                   | 4.4                 | 0.5 | 4.8                   |
| 4.3                 | 0.6 | 4.9                   | 4.4                 | 0.7 | 5.0                   | 4.3                 | 0.6 | 4.9                   |
| 3.2                 | 0.6 | 5.1                   | 3.2                 | 0.6 | 5.1                   | 3.3                 | 0.6 | 5.1                   |
| 2.6                 | 0.6 | 5.3                   | 2.6                 | 0.6 | 5.3                   | 2.6                 | 0.6 | 5.3                   |
| 7.0                 | 0.8 | 4.8                   | 7.0                 | 0.8 | 4.8                   | 6.8                 | 0.7 | 4.7                   |
| 6.2                 | 0.9 | 4.9                   | 5.0                 | 0.9 | 5.1                   | 6.0                 | 0.8 | 4.9                   |
| 3.4                 | 0.5 | 4.9                   | 3.4                 | 0.5 | 4.9                   | 3.4                 | 0.5 | 4.9                   |
| 1.8                 | 0.5 | 5.0                   | 1.8                 | 0.5 | 5.5                   | 1.8                 | 0.4 | 5.3                   |
| 5.2                 | 0.7 | 4.9                   | 5.2                 | 0.8 | 5.0                   | 5.2                 | 0.8 | 5.0                   |
| 4.4                 | 1.1 | 5.4                   | 4.6                 | 1.3 | 5.5                   | 4.6                 | 1.3 | 5.5                   |
| 5.1                 | 1.3 | 5.4                   | 5.1                 | 1.3 | 5.4                   | 5.0                 | 1.2 | 5.3                   |
| 2.2                 | 0.6 | 5.5                   | 2.0                 | 0.5 | 5.4                   | 2.0                 | 0.5 | 5.4                   |
| 7.9                 | 1.5 | 5.1                   | 7.7                 | 1.3 | 5.0                   | 7.9                 | 1.5 | 5.1                   |

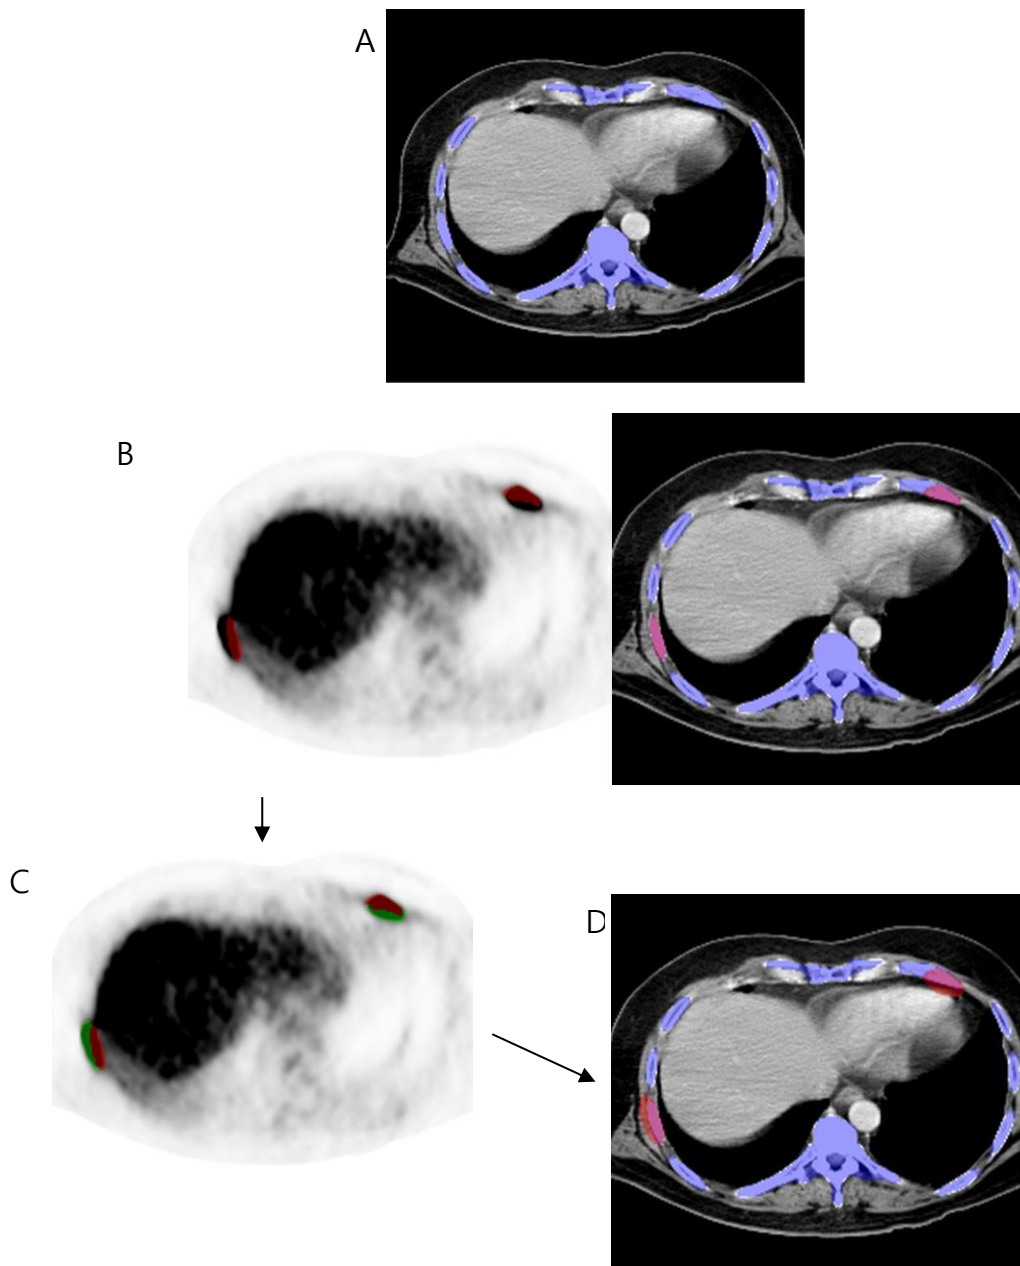

**Supplemental Figure 1.** The extend bone lesion algorithm. Firstly, the bone mask is automatically computed (A) and the  $SUV_{thr\_bone}$  is applied (B). To assign the bone lesions located outside the bone mask falsely recognized as soft tissue lesions, their  $SUV_{thr\_st}$  is changed to 3 (C). Finally, the algorithm is applied and soft-tissue lesions that are in conjunction with bone lesions are automatically assigned to bone lesions (D).

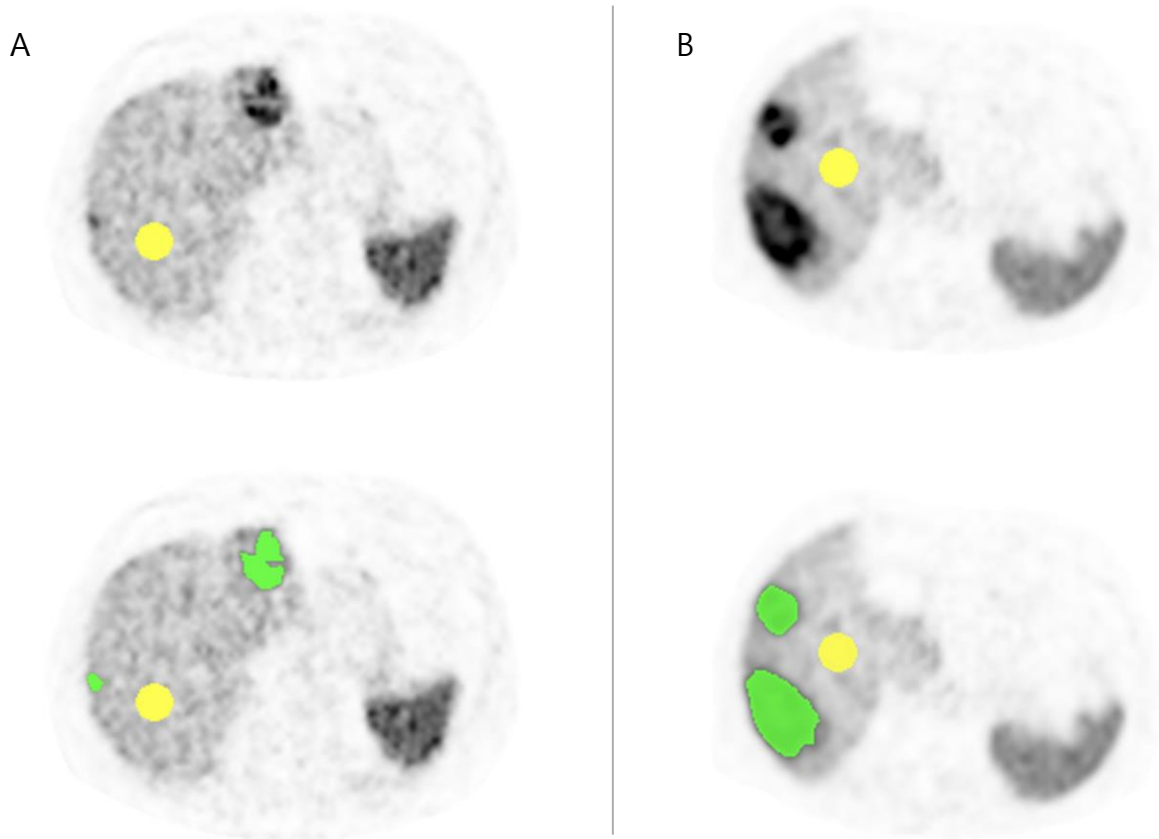

**Supplemental Figure 2.** Example of SUV<sub>thr\_st</sub> computation in two mCRPC patients with liver involvement. Yellow discs represent the automatically computed 3-cm spherical VOI within right liver lobe. The SUV<sub>thr\_st</sub> values were 5.2 (A) and 5.0 (B). Liver metastases were subsequently segmented (green labels).
